# Supplementary material
Source: PubMed Central journal article supplement (PMC3084352)
Supplement: NIHMS272507-supplement-1.pdf [file NIHMS272507-supplement-1.pdf]

## **Supplementary Information Guide**

### **A System for the Continuous Directed Evolution of Biomolecules**

Kevin M. Esvelt, Jacob C. Carlson, David R. Liu\*

Department of Molecular and Cellular Biology, Department of Chemistry and Chemical Biology, and  
the Howard Hughes Medical Institute  
Harvard University, 12 Oxford Street, Cambridge, MA 02138

#### **Supplementary Results**

Calculation of phage generation time during PACE

Mutagenesis

Mutational analysis of iC<sub>6</sub>-evolved variants

#### **Supplementary Figures and Legends**

Supplementary Figure 1

Supplementary Figure 2

Supplementary Figure 3

Supplementary Figure 4

Supplementary Figure 5

Supplementary Figure 6

Supplementary Figure 7

Supplementary Figure 8

Supplementary Figure 9

Supplementary Figure 10

Supplementary Figure 11

Supplementary Figure 12

#### **Supplementary Tables**

Supplementary Table 1

Supplementary Table 2

Supplementary Table 3

#### **References for Methods and Supplementary Information**
