# Supplementary material
Source: PubMed Central journal article supplement (PMC3084352)
Supplement: NIHMS272507-supplement-2.pdf [file NIHMS272507-supplement-2.pdf]

## **Supplementary Information**

### **A System for the Continuous Directed Evolution of Biomolecules**

Kevin M. Esvelt, Jacob C. Carlson, David R. Liu\*

Department of Molecular and Cellular Biology, Department of Chemistry and Chemical Biology, and  
the Howard Hughes Medical Institute  
Harvard University, 12 Oxford Street, Cambridge, MA 02138

### **Supplementary Results**

**Calculation of phage generation time during PACE.** We estimated the phage generation time using a steady-state replication model in which phage fitness is constant. One phage generation encompasses an infected cell exiting the lagoon, one of its progeny phage infecting an incoming cell, and that infected cell exiting the lagoon. To determine the average time required for one of the progeny phage to infect an incoming cell, we assumed that no progeny phage have yet infected an incoming cell and that cells entering the lagoon are instantaneously infected due to the high phage ( $5 \times 10^{10} \text{ mL}^{-1}$ ) and cell ( $5 \times 10^8 \text{ mL}^{-1}$ ) concentrations relative to the adsorption coefficient of filamentous phage ( $3 \times 10^{-11} \text{ mL}^1 \text{ min}^{-1} \text{ phage}^{-1} \text{ cell}^{-1}$ ).<sup>33</sup>

Because lagoons operate in a steady state during most of a PACE experiment, the total phage and cell concentration does not change over time. Therefore, the progeny of a single cell exiting the lagoon infects exactly one cell entering the lagoon, on average, to achieve population replacement. A number of incoming cells equal to the total cell population will enter before one of the progeny phage achieves infection. Consequently, the average time from instantaneous cell exit to infection of a new cell by a progeny phage is  $1/(\text{dilution rate})$ .

According to the dilution equation, solutes wash out at a rate of  $dC/dt = -(\text{dilution rate}) * (\text{concentration})$ . This gives a washout equation of  $C(t) = c_1 * \exp[-(\text{dilution rate}) * \text{time}]$ . This washout equation may be used as the probability density function  $\text{prob}[\text{time}]$  for the probability of a given cell washing out at a specific time after it enters the lagoon. To ensure that the probability of all currently resident cells washing out given infinite time is 1, we set  $c_1 = 1 / (\text{dilution rate})$ . To calculate the probability  $\langle t \rangle$  for a single cell, we integrate  $[t * \text{prob}[t], \{t, 0, \text{infinity}\}]$ . The integral of  $[\text{time} * (\text{dilution rate}) * \exp[-(\text{dilution rate}) * \text{time}], \{t, 0, \text{infinity}\}] = 1 / (\text{dilution rate})$ . Therefore, the average time from infection to washout is also equal to  $1 / (\text{dilution rate})$ .

Summing the two halves of the phage replicative cycle, the average phage generation time in our model is equal to  $2 / (\text{dilution rate})$ . At a dilution rate of 2.0 volumes/hour, as in the evolution towards T3 promoter recognition, the average phage undergoes 24 generations per 24 hours. At 2.5 volumes/hour, as in the initiation site evolution experiments, the average phage undergoes 30 generations per 24 hours. For the maximum observed dilution rate of 3.2 volumes/hour, the average phage undergoes just over 38 generations per 24 hours. In all cases the fastest replicating 1% of phage have undergone a significantly greater number of generations per 24 hours.

**Mutagenesis.** The mutagenesis plasmid (MP) encodes the DNA polymerase dominant negative proofreading subunit dnaQ926<sup>20</sup> and the error-prone repair DNA polymerase pol V (See the vector map in Supplementary Figure 2). The rapid expression of pol V from the MP may permit the use of alkylating mutagens which generate lesions that cannot otherwise be bypassed during DNA replication, as induction of the SOS pathway leading to pol V production requires longer than the average residence time of a host cell in the lagoon.<sup>21</sup> Both dnaQ926 and pol V are under the control of the araBAD operon and are expressed only when arabinose is added to the lagoon.

The basal mutation rate of replicating filamentous phage ( $5.3 \times 10^{-7}$  substitutions/bp)<sup>34</sup> is sufficient to generate all possible single but not double mutants of a given library member in a 100 mL lagoon. For a target gene 1,000 base-pairs in length, a basal mutation rate of  $5 \times 10^{-7}$  yields  $2.5 \times 10^7$  base substitutions spread over  $5 \times 10^{10}$  copies of the gene in a 100 mL lagoon after one phage generation, easily covering all single point mutants but not all double mutants. Arabinose induction of the MP can increase the mutation rate to  $\sim 5 \times 10^{-5}$ , yielding  $\sim 2.5 \times 10^9$  mutations spread over  $5 \times 10^{10}$  copies of the gene after one generation. The vast majority are single mutants which together comprise a target area of  $\sim 2.5 \times 10^{12}$  base pairs, suggesting that some  $1.2 \times 10^8$  are double mutants, sufficient to cover all  $9 \times 10^6$  possible double mutants.

**Mutational analysis of T3-evolved variants.** Mutational analysis (Supplementary Table 2) of the PACE-evolved T7 RNAP genes revealed basic structure-activity relationships among mutant clones (Fig. 3d). The N748D mutation known to enable recognition of the T3 base at the -11 position<sup>21</sup> appeared in isolates of both lagoons within 48 hours after shifting to the full T3 promoter (Fig. 3d). Two other known mutations observed during PACE include E222K, a specificity broadener,<sup>22</sup> and K98R, a change to the corresponding amino acid in T3 RNAP that directly contacts the -15 and -16

bases altered in the T3 promoter.<sup>28</sup> These two mutations were never observed in the same clone, suggesting mutual exclusivity or similar functional effects.

**Mutational analysis of iC<sub>6</sub>-evolved variants.** Mutational analysis (Supplementary Table 2) revealed that the H524N and A827V mutations were conserved among all 12 sequenced clones, presumably arising very early during PACE. In addition, all clones contained either K577M or both C125R and S128R. Several clones contained all five mutations, including the most active clone assayed, suggesting that both observed sets of mutations increase activity and are mutually compatible. Of the five mutations, only C125R and S128R are predicted to be capable of contacting and stabilizing the newly initiated RNA, though A827V is in close proximity to the active site.

## Supplementary Figures and Legends

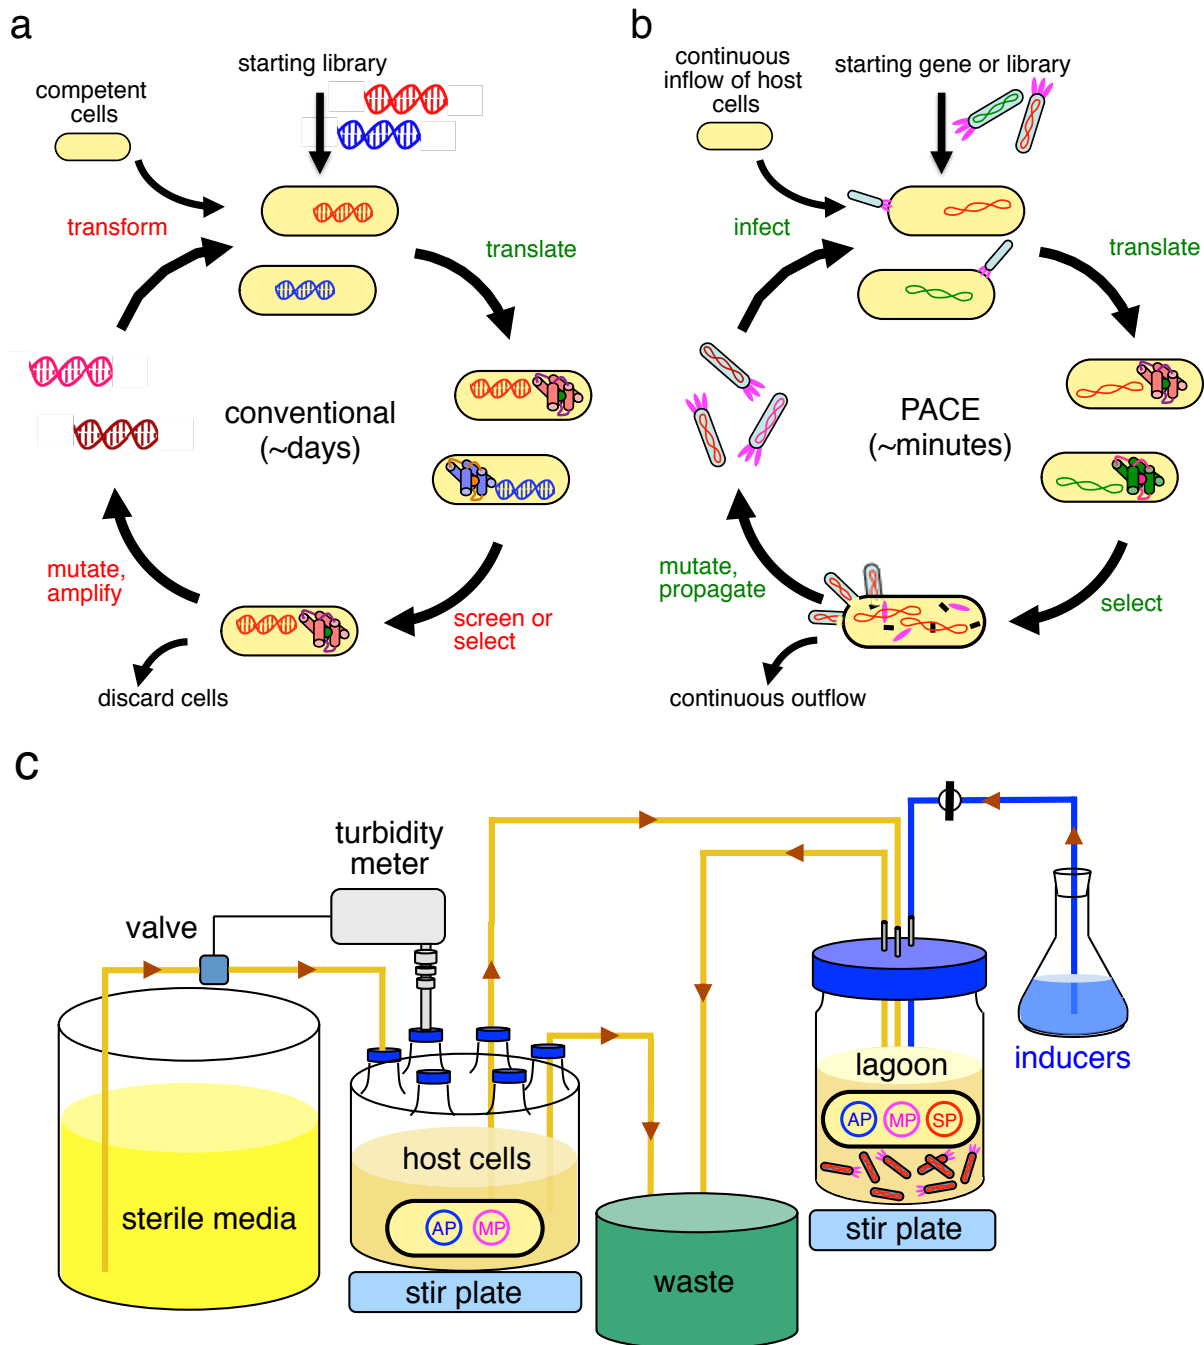

**Supplementary Figure 1.** Directed evolution cycles in (a) conventional directed evolution in cells and (b) phage-assisted continuous evolution (PACE). Steps in the evolution cycle that typically require the intervention of the researcher are shown in red; those that do not are shown in green. (c) Schematic of the PACE apparatus. Host *E. coli* cells maintained at constant cell density continuously flow through a lagoon vessel (along with optional chemical inducers) containing phage at dilution rates of  $\sim 1.0$ - $3.2$  lagoon volumes per hour.

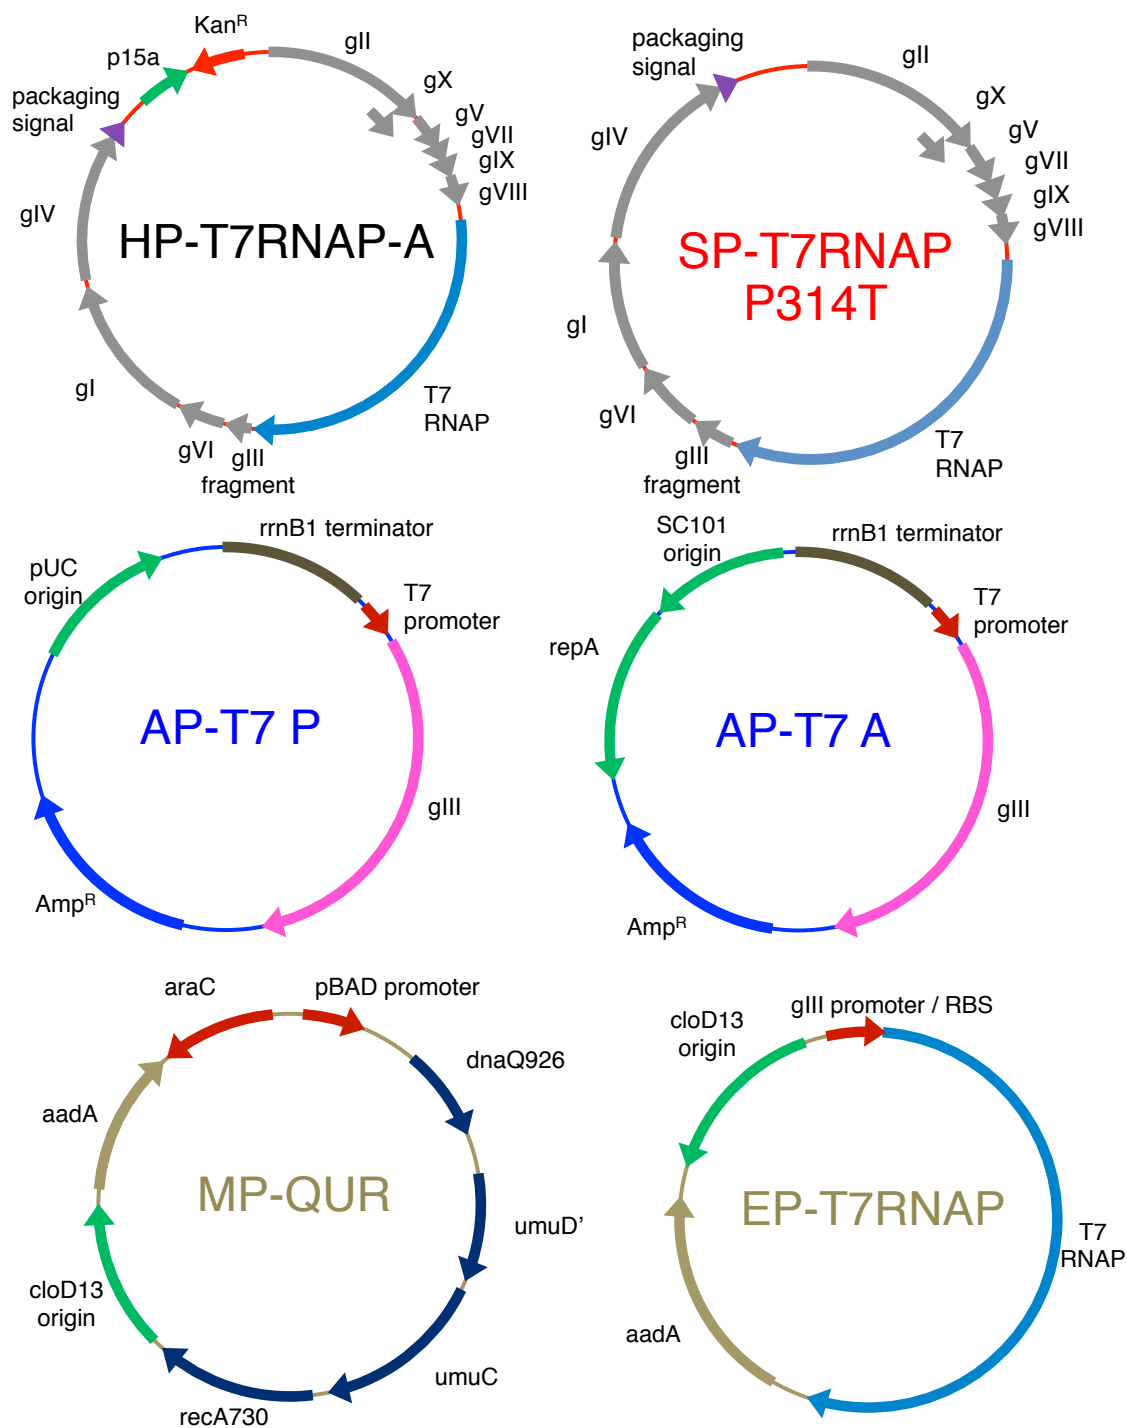

**Supplementary Figure 2.** Vector maps of plasmids used in PACE experiments. Helper phage HP-T7RNAP was used for the discrete infection assays in Fig. 3. Continuous propagation on host cells bearing accessory plasmid AP-T7 P for 48 hours yielded selection phage SP-T7RNAP P314T, the starting point for subsequent PACE experiments. Accessory plasmid AP-T7 A is the lower-copy version of AP-T7 P used to increase selection stringency. AP-T7 R and AP-T7 S are identical to AP-T7 P except for the gIII ribosome-binding site as detailed in the Plasmids section of the Methods. The arabinose-inducible mutagenesis plasmid MP-QUR was used for all mutagenesis and PACE experiments. The expression plasmid EP-T7RNAP was used to assay transcriptional activity in cells. See Supplementary Table 1 for additional information about all vectors used in this work.

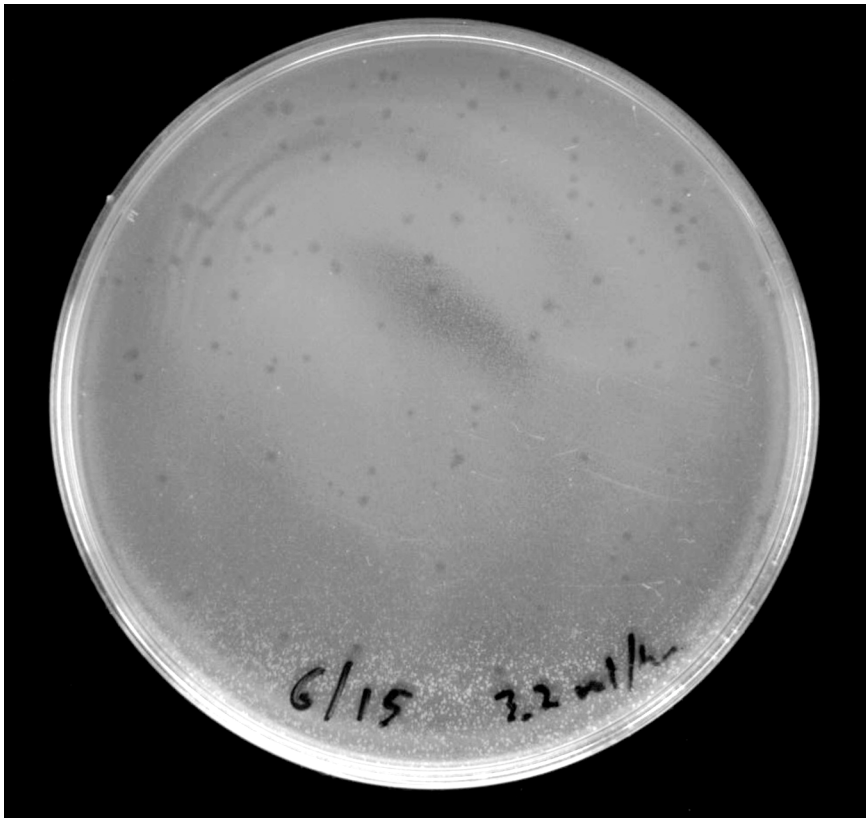

**Supplementary Figure 3.** Continuous phage propagation persists at a lagoon flow rate of 3.2 volumes per hour. A plaque assay was performed after continuous overnight dilution of SP encoding wild-type T7 RNA polymerase propagating on host cells containing an AP with a high-copy wild-type T7 promoter at a flow rate of 3.2 lagoon volumes per hour. The presence of plaques containing T7 phage indicates that the phage replication rate is sufficient to withstand this dilution rate.

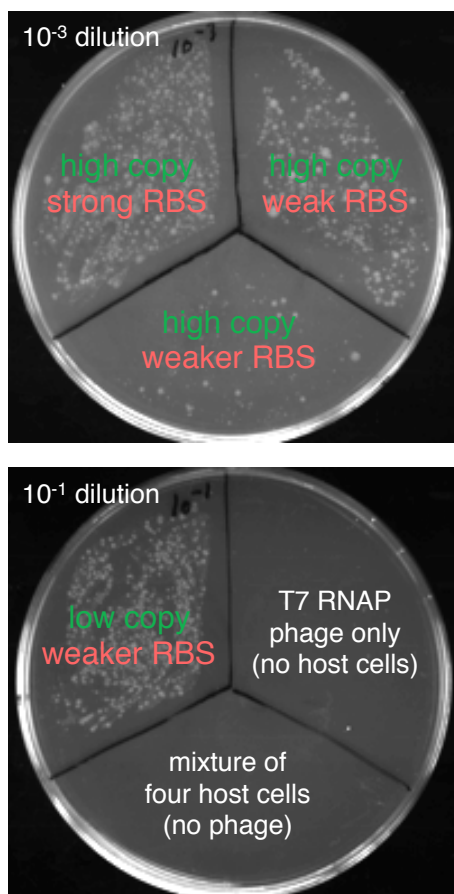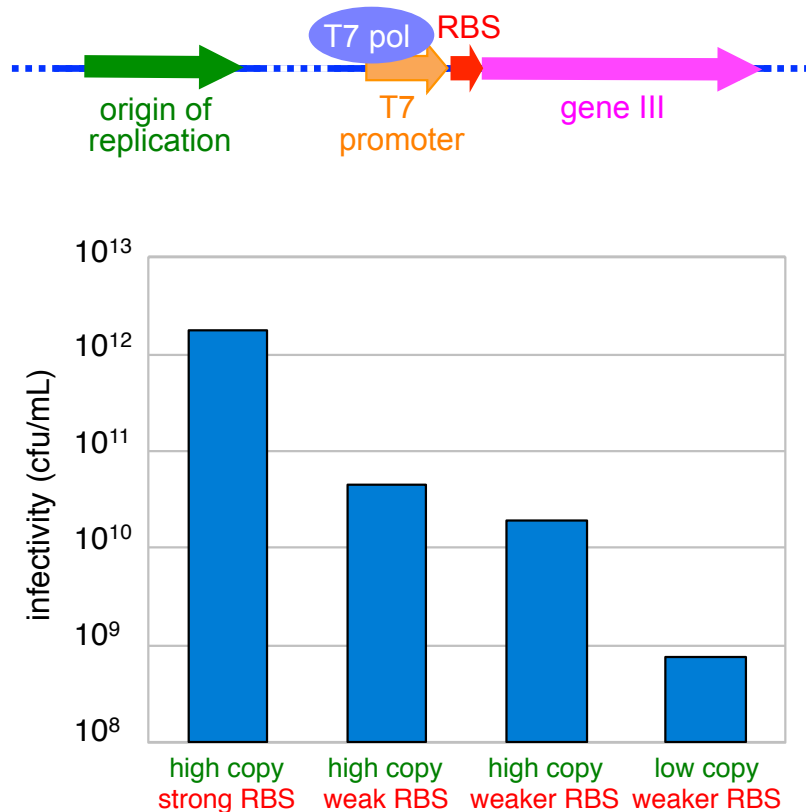

**Supplementary Figure 4.** Selection stringency can be controlled by varying the gene III RBS and the accessory plasmid copy number. Selection phage encoding T7 RNAP were paired with accessory plasmids containing a strong, weak, or weaker ribosome binding site with a high-copy colE1 or a very low-copy SC101 origin. Phage infectivity diminished with decreasing RBS strength and with decreasing copy number, reflected in lower phage titers.

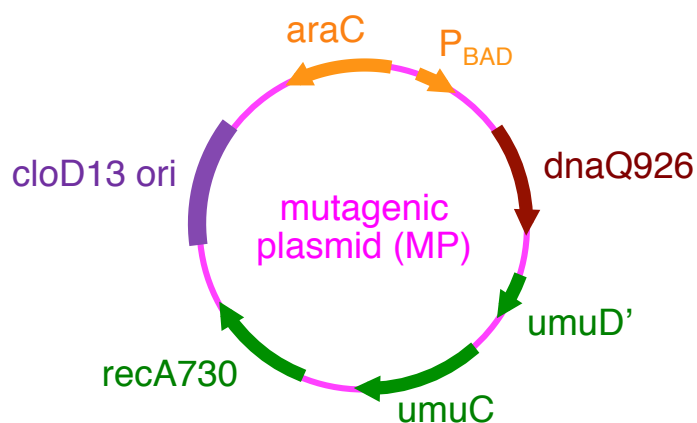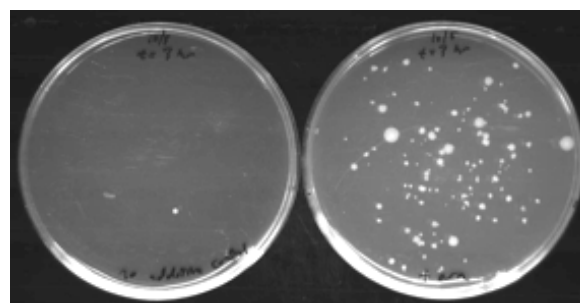

– arabinose                      + arabinose

observed mutations ( $n = 72$ )

G/C to A/T: 43%  
A/T to G/C: 12%  
G/C to T/A: 15%  
A/T to C/G: 8%  
G/C to C/G: 7%  
A/T to T/A: 10%

# mutant colonies after 3 hours

|        | – arabinose | + arabinose |
|--------|-------------|-------------|
|        | 1           | 114         |
|        | 2           | 204         |
|        | 9           | 861         |
|        | 1           | 60          |
| total: | 13          | 1239        |

**Supplementary Figure 5.** Structure and function of the mutagenesis plasmid (MP). Induction with arabinose increases the frequency of inactivating mutations in a phage-encoded *lacI* gene by ~100-fold over four independent experiments. All types of transitions and transversions were observed, with a bias towards G/C to A/T transitions.

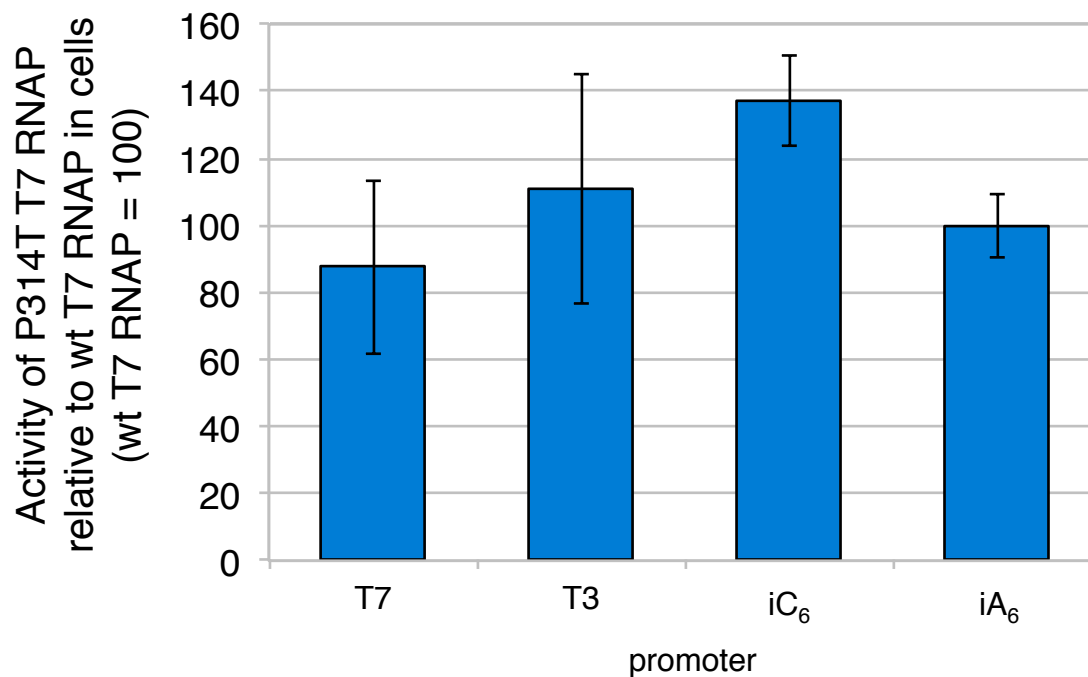

**Supplementary Figure 6.** Transcriptional activity of the starting T7 RNAP harbouring a P314T mutation is similar to that of wild-type polymerase when assayed on T7, T3, iC<sub>6</sub>, and iA<sub>6</sub> promoters in cells. Each bar shows the activity of the P314T mutant RNAP relative to wild-type T7 RNAP (defined as 100) on the same promoter. Note that absolute transcriptional activity levels differ dramatically between bars; only relative levels comparing P314T to wild-type T7 RNAP for each promoter are shown. Error bars represent the standard deviation of at least three independent assays.

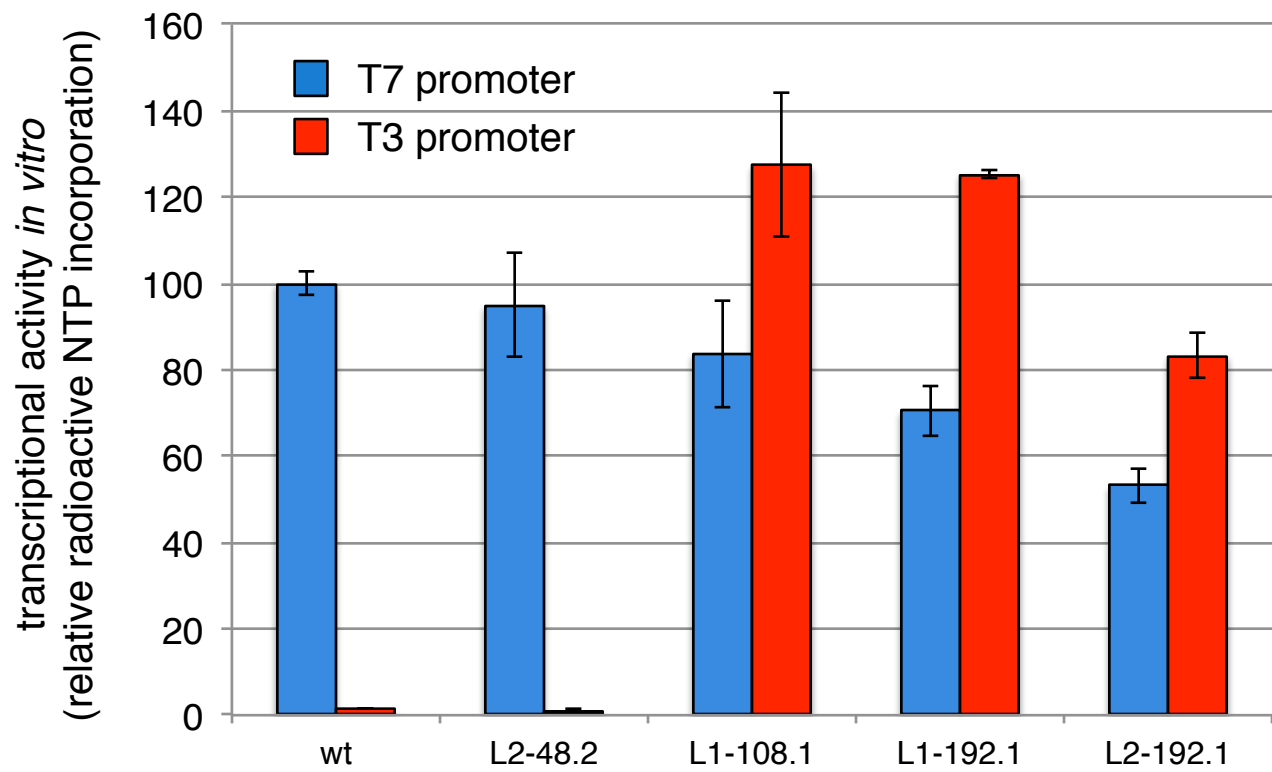

**Supplementary Figure 7.** *In vitro* activity of purified T7 RNAP mutants from lagoons 1 and 2. Transcriptional activity was measured *in vitro* using a standard radioactive nucleotide incorporation assay.<sup>30</sup> Error bars represent the standard deviation of at least three independent assays.

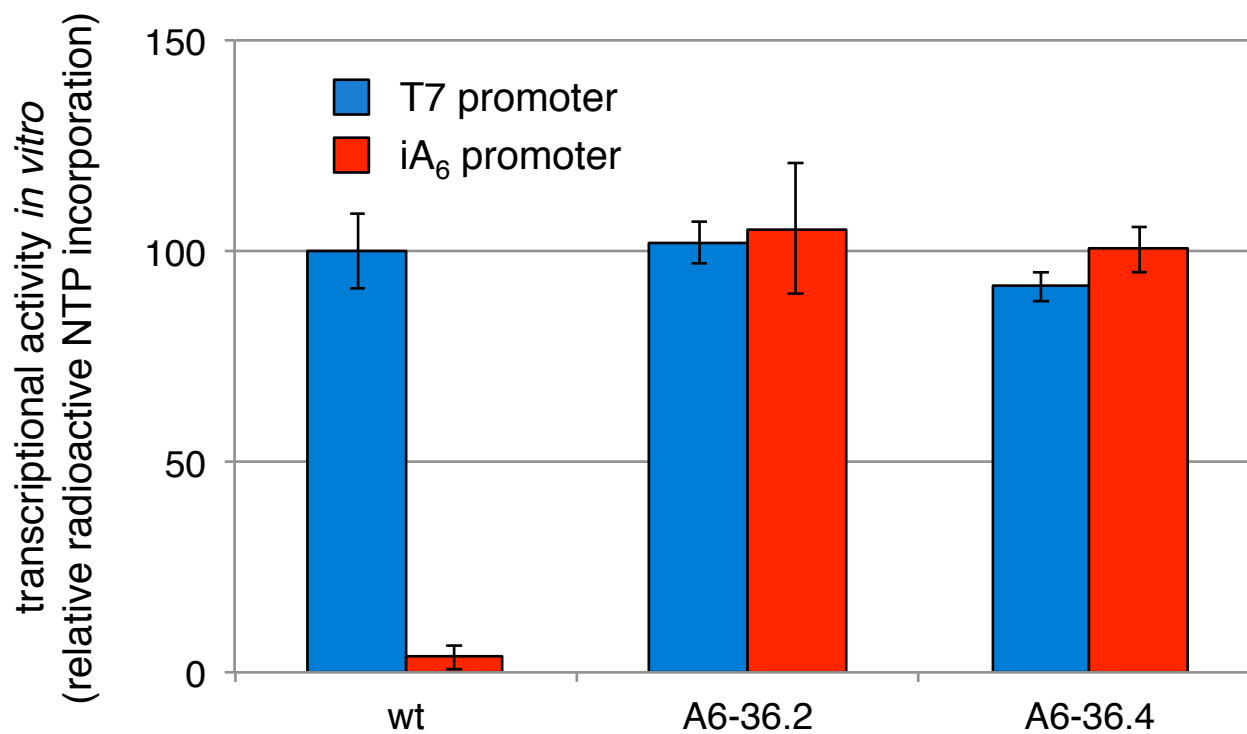

**Supplementary Figure 8.** *In vitro* activity of purified T7 RNAP mutants evolved to recognize the iA<sub>6</sub> promoter. Transcriptional activity was measured *in vitro* using a standard radioactive nucleotide incorporation assay.<sup>30</sup> Error bars represent the standard deviation of at least three independent assays.

a

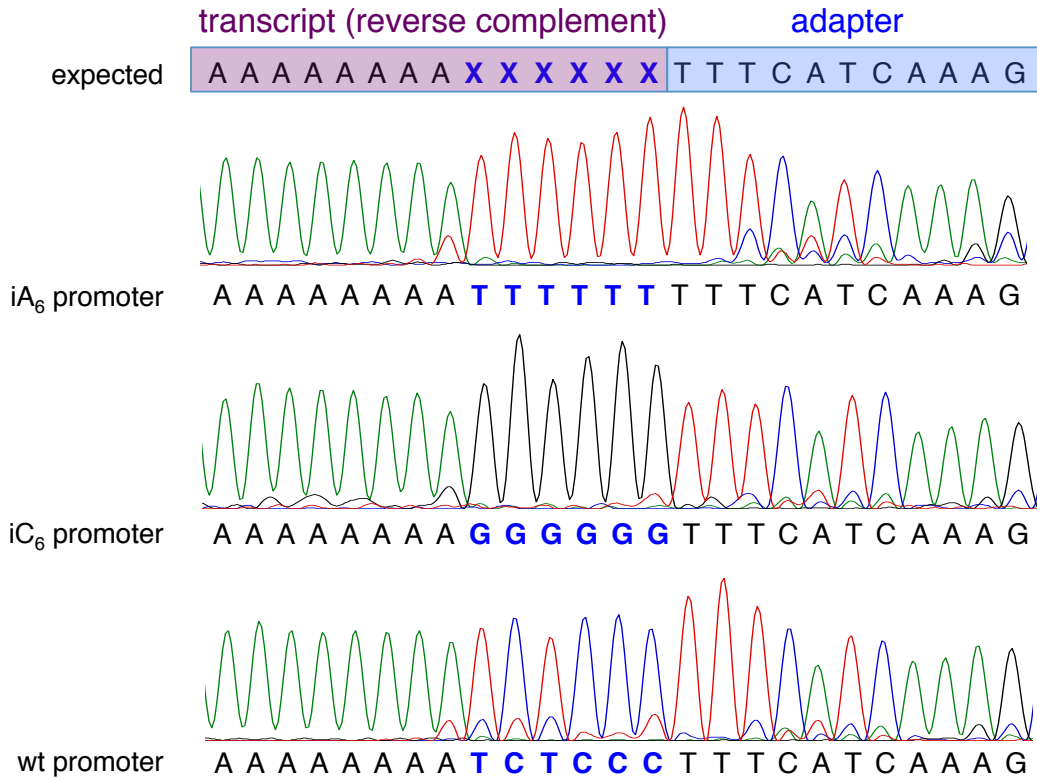

b

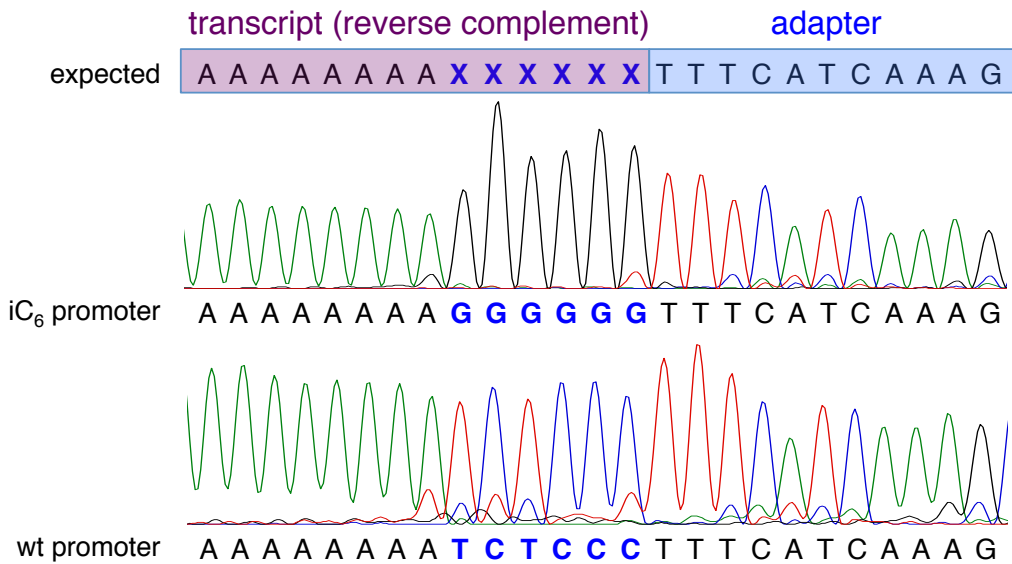

**Supplementary Figure 9.** RNA sequences of transcription products from evolved polymerase enzymes. (a) DNA sequence chromatograms from RACE analysis of the C6-80.9 evolved polymerase transcribing either the iC<sub>6</sub> template (upper trace) or the wild-type template (lower trace). (b) DNA sequence chromatograms from RACE analysis of the A4-36.4 evolved polymerase transcribing the iA<sub>6</sub> template (upper trace), the iC<sub>6</sub> template (middle trace) or the wild-type template (lower trace). Initiation began at +1 with template-encoded bases rather than non-templated nucleotides, demonstrating that A4-36.4 is capable of initiating with GTP, ATP, or CTP. See Methods for experimental details.

a

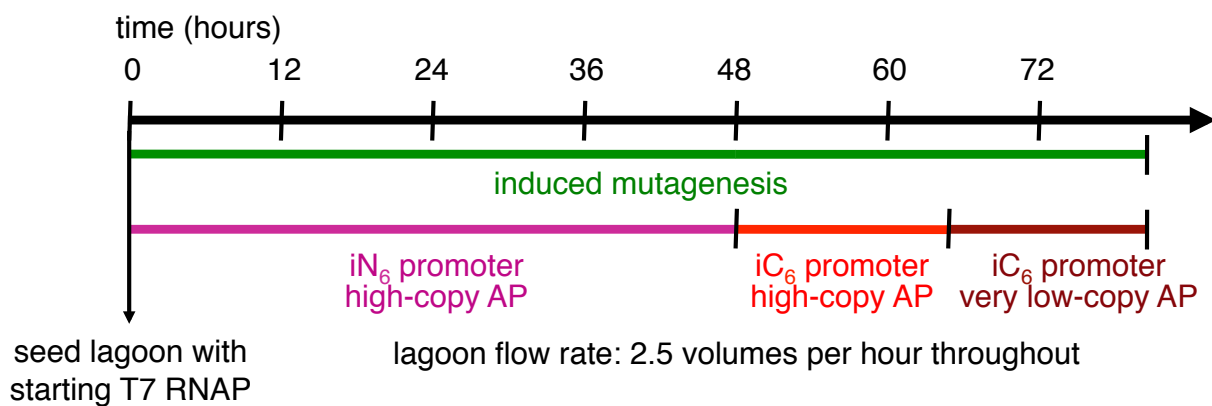

b

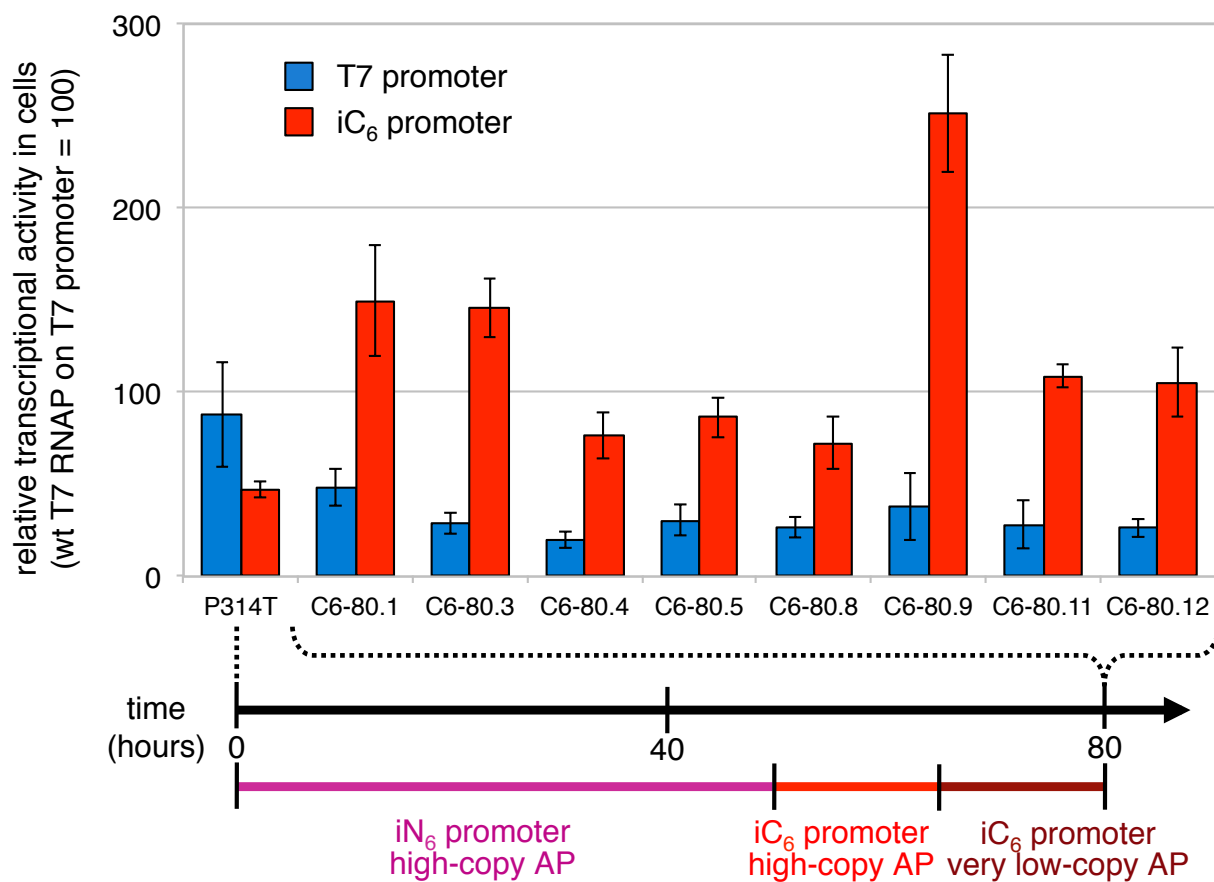

(Supplementary Figure 10 continues on the next page).

**C**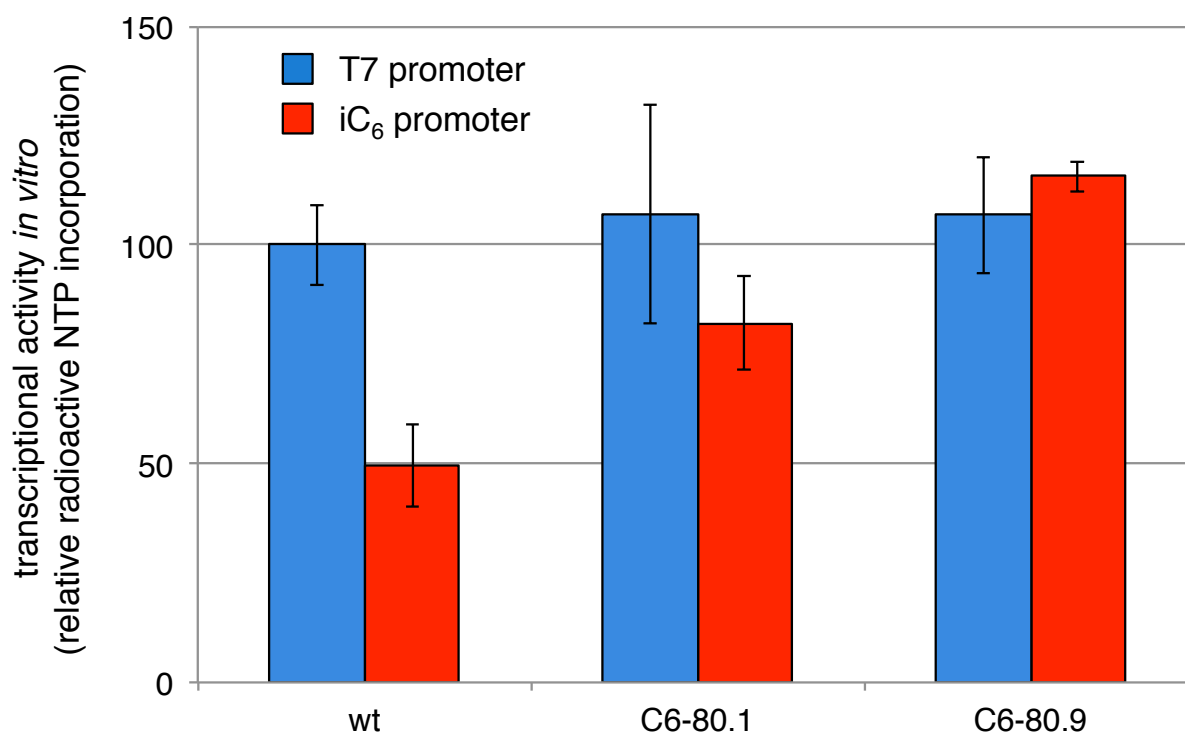

**Supplementary Figure 10.** Evolution of T7 RNAP variants that initiate transcription with C. (a) PACE schedule. (b) Activity in cells on the T7 and iC<sub>6</sub> promoters of T7 variants isolated after 80 hours of PACE. Assays were performed as described in Fig. 3b. (c) *In vitro* activity of a selection of purified T7 RNAP variants assayed in (b). Transcriptional activity was measured *in vitro* using a standard radioactive nucleotide incorporation assay. Error bars represent the standard deviation of at least three independent assays.

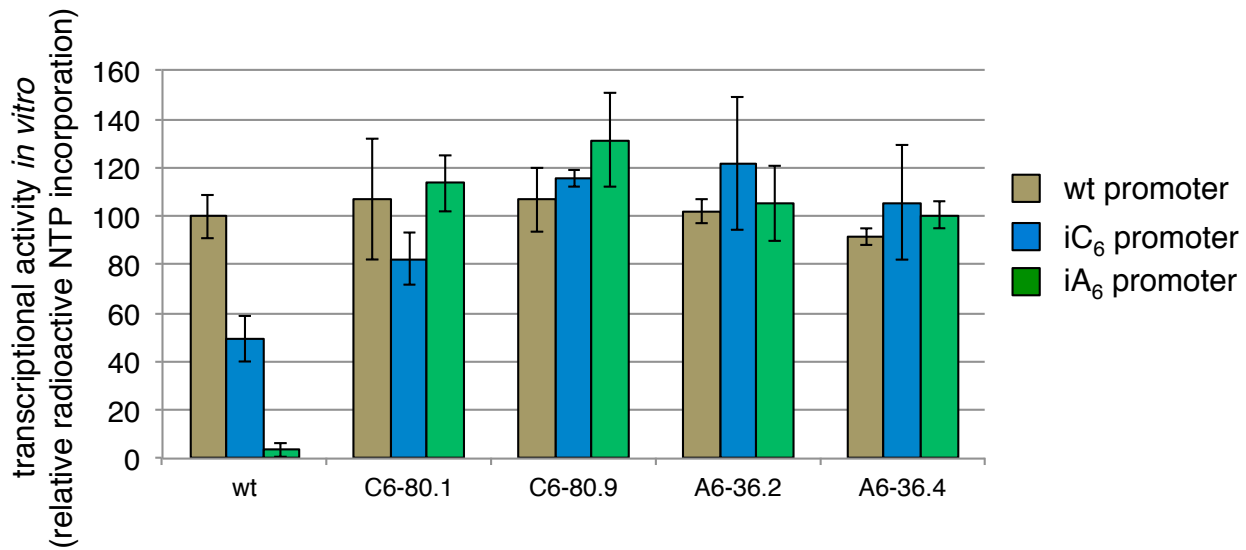

**Supplementary Figure 11.** *In vitro* transcription activity of T7 RNAP mutants evolved to initiate on the iC<sub>6</sub> and iA<sub>6</sub> promoters assayed on wild-type, iC<sub>6</sub>, and iA<sub>6</sub> promoters. Transcriptional activity was measured *in vitro* using a standard radioactive nucleotide incorporation assay. All four variants assayed exhibit the ability to initiate transcription with wild-type-like efficiency on wild-type, iC<sub>6</sub>, and iA<sub>6</sub> promoters. Error bars represent the standard deviation of at least three independent assays.

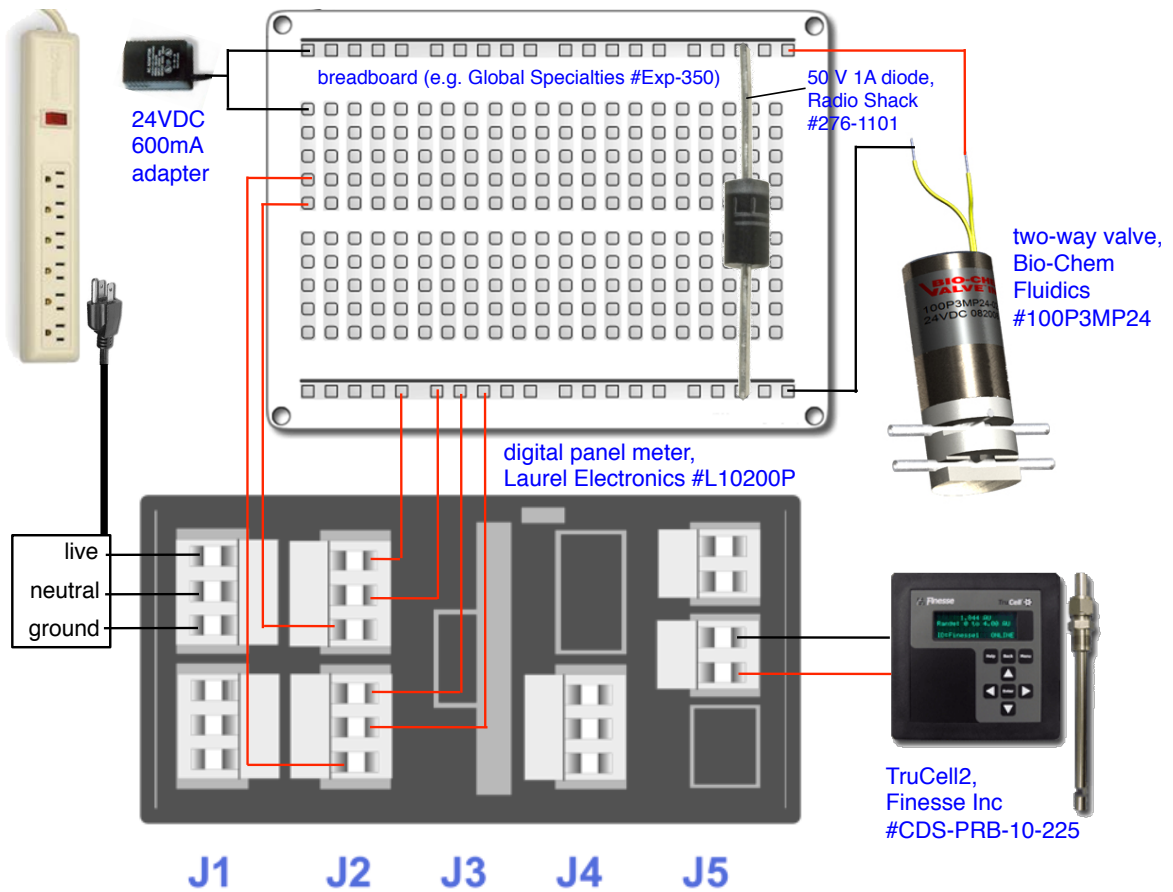

**Supplementary Figure 12.** Schematic illustrating the electrical system controlling the flow of fresh media in response to the cell density. The valve controlling turbidostat media inflow is opened and closed by a programmable digital panel meter processing cell density information from the TruCell2 probe.

**Supplementary Table 1.** Plasmids used in this work.

| <b>PACE plasmid</b>     | <b>Class</b>       | <b>Source</b> | <b>Notes</b>                                       |
|-------------------------|--------------------|---------------|----------------------------------------------------|
| HP-T7RNAP-A             | Selection phage    | This work     | VCSM13-derived; T7RNAP replaces gIII               |
| SP-T7RNAP P314T         | Selection phage    | This work     | Evolved from HP-T7-A; no longer Kan <sup>R</sup>   |
| AP-T7 P                 | Accessory          | This work     | High-copy T7RNAP accessory                         |
| AP-T7 A                 | Accessory          | This work     | Very low-copy T7RNAP accessory                     |
| AP-T7T3 P               | Accessory          | This work     | AP-T7 P: hybrid promoter                           |
| AP-T3 P                 | Accessory          | This work     | AP-T7 P: T3 promoter                               |
| AP-T3 A                 | Accessory          | This work     | AP-T7 A: T3 promoter                               |
| AP-T7-iN6 P             | Accessory          | This work     | AP-T7 P: N6 transcript start                       |
| AP-T7-iC <sub>6</sub> P | Accessory          | This work     | AP-T7 P: C <sub>6</sub> transcript start           |
| AP-T7-iC <sub>6</sub> A | Accessory          | This work     | AP-T7 A: C <sub>6</sub> transcript start           |
| AP-T7-iA <sub>6</sub> P | Accessory          | This work     | AP-T7 P: A <sub>6</sub> transcript start           |
| AP-T7-iA <sub>6</sub> A | Accessory          | This work     | AP-T7 A: A <sub>6</sub> transcript start           |
| MP-QUR                  | Mutagenesis        | This work     | +ara -> dnaQ926, DNA pol V                         |
| <b>Other plasmids</b>   |                    |               |                                                    |
| AP-T7 R                 | Accessory          | This work     | Weak RBS                                           |
| AP-T7 S                 | Accessory          | This work     | Weaker RBS                                         |
| EP-T7RNAP               | Expression plasmid | This work     | For in-cell activity quantification                |
| HPdOd3                  | Helper             | This work     | For phagemid infection assays                      |
| AP-RNAP $\alpha$ -LGF2  | Accessory          | This work     | 2-hybrid accessory                                 |
| SP-Gal11p-Zif268        | Selection phagemid | This work     | 2-hybrid phagemid                                  |
| AP-RZH3                 | Accessory          | This work     | Recombinase accessory                              |
| SP-HinHZ                | Selection phagemid | This work     | Recombinase *phagemid                              |
| SP-Cre                  | Selection phagemid | This work     | Control phagemid                                   |
| VCSM13-lacI             | Assay phage        | This work     | For loss-of-function mutagenesis assay             |
| pJC137                  | Assay plasmid      | This work     | Selects for loss of <i>lacI</i> repressor function |
| pT7-911Q                | Expression plasmid | V. D'Souza    | T7 RNAP expression/purification                    |

**Supplementary Table 2.** Genotypes of assayed T7 RNAP variants

| Target          | Clone    | Amino acid changes                                    | Silent mutations (bp)                   |
|-----------------|----------|-------------------------------------------------------|-----------------------------------------|
| T3              | L1-48.1  | I4M G175R Y178H E222K M267I E484A G542V L699I         | t2239c g2274a t2376c                    |
| T3              | L1-48.2  | I4M G175R H176L Y178H E484A G542V L699I               | g2274a                                  |
| T3              | L1-48.3  | I4M G175R E222K E356D G542V L699I                     | g1440a c1587t                           |
| T3              | L1-108.1 | I4M G175R E222K Q239R G542V N748D                     | a378g c2238a                            |
| T3              | L1-108.2 | I4M G175R E222K Q239R G542V N748D                     | c2238a                                  |
| T3              | L1-108.3 | I4M G175R E222K Q239R G542V N748D                     | t1725c c2238a                           |
| T3              | L1-192.1 | I4M E63V S128R G175R E222K Q239R G542V N748D          | c2238a t2376a                           |
| T3              | L1-192.2 | I4M E63G S128R G175R E222K D351A G542V N748D          | a1020g c2238a t2376a                    |
| T3              | L2-48.1  | N165S G542V N601S E775K                               | c327t g957a                             |
| T3              | L2-48.2  | N165S A354S L360P K450R G542V E775K                   |                                         |
| T3              | L2-48.3  | N165S G542V K577E E775K                               | c583t c2265t                            |
| T3              | L2-108.1 | I4M T76N Y178H F182L D208Y G542V N748D E775K L864F    |                                         |
| T3              | L2-108.2 | I4M T76N Y178H F182L D208Y G542V N748D E775K L864F    |                                         |
| T3              | L2-108.3 | N165S L196F E222K G280C M401T P451T G542V N748D E775K | c2265t                                  |
| T3              | L2-192.1 | I4M D66Y G175R E222K G280C G542V N748D E775K L864F    | c1182a t1446c                           |
| iC <sub>6</sub> | C6-80.1  | A65E C125R S128R M267V H524N A827V                    | g537a c762a g915a g1236a g1380a         |
| iC <sub>6</sub> | C6-80.3  | C125R S128R Y385C H524N K577M A827V D851N             | c762a a807g g1236a g1380a g1599t g2631a |
| iC <sub>6</sub> | C6-80.4  | H524N K577M Q754R A827V                               | a231g c726a a807g g1236a g1380a g2631a  |
| iC <sub>6</sub> | C6-80.5  | A383V H524N K577M A827V                               | c762a a807g g1236a t1275g g1380a g2631a |

|                 |          |                                           |                                                                  |
|-----------------|----------|-------------------------------------------|------------------------------------------------------------------|
| iC <sub>6</sub> | C6-80.8  | C125R S128R H524N K577M K713E A827V       | c762a a807g g1236a g1380a<br>g2631a                              |
| iC <sub>6</sub> | C6-80.9  | C125R S128R H524N K577M A827V             | c762a a807g g1236a g1380a<br>g2631a                              |
| iC <sub>6</sub> | C6-80.11 | A7T V64D C125R S128R D388Y H524N A827V    | c762a a807g g1236a g1380a<br>g2631a                              |
| iC <sub>6</sub> | C6-80.12 | C125R S128R N410S H523L H524N K577M A827V | a696g c762a a807g t858c<br>g1197a c1269a g1431a<br>a1926g t2626c |
| iA <sub>6</sub> | A6-36.1  | K93T H300R S397R S684Y                    |                                                                  |
| iA <sub>6</sub> | A6-36.2  | K93T G198V T243N G259D H300R S397R S684Y  | g585a                                                            |
| iA <sub>6</sub> | A6-36.3  | K93T S397R E565K S684Y                    | t1284c                                                           |
| iA <sub>6</sub> | A6-36.4  | K93T A136T S228A S397R S684Y              | t2052c                                                           |
| iA <sub>6</sub> | A6-36.5  | K93T S228A S397R S684Y                    | t2052c                                                           |

**Supplementary Table 3.** Complete list of reagents, equipment, and suppliers.

| <b><u>Turbidostat</u></b>                               | <b><u>Source</u></b>        | <b><u>Catalog #</u></b> | <b><u>Purpose</u></b>       |
|---------------------------------------------------------|-----------------------------|-------------------------|-----------------------------|
| BioProbe flask, 0.5 L                                   | Bellco Glass                | 1965-97005              | Turbidostat, small          |
| BioProbe flask, 1 L                                     | Bellco Glass                | 1965-97001              | Turbidostat,<br>medium      |
| BioProbe flask, 3 L                                     | Bellco Glass                | 1965-97003              | Turbidostat, large          |
| Corning Scholar 171 magnetic stirrer                    | Thermo Fisher<br>Scientific | 11-497-22               | Stirs turbidostats          |
| Corning PC-240 magnetic stirrer                         | Thermo Fisher<br>Scientific | 114973C                 | Stirs large<br>turbidostats |
| GL32 probe holder                                       | Bellco Glass                | 1965-97010              | Holds cell density<br>probe |
| GL45 septa                                              | Bellco Glass                | C139-545SS              | Port access                 |
| GL32 septa                                              | Bellco Glass                | C139-532SS              | Port access                 |
| GL45 open caps                                          | Bellco Glass                | C139-<br>545HTSC        | Port access                 |
| GL32 open caps                                          | Bellco Glass                | C139-<br>532HTSC        | Port access                 |
| Large autoclavable venting filter 6-10mm                | VWR                         | 28137-652               | Turbidostat<br>venting      |
| 24VDC 3-way valve                                       | Bio-Chem Fluidics           | 100P3MP24-<br>05S       | Controlling media<br>flow   |
| Masterflex L/S economy variable drive                   | Cole Parmer, Inc            | 07554-80                | Fluid transfer              |
| L/S 8-channel, 3-roller pump head                       | Cole Parmer, Inc            | 07519-05                | Fluid transfer              |
| Masterflex L/S small cartridges                         | Cole Parmer, Inc            | 07519-80                | Fluid transfer              |
| Tygon two-stop pump tubing, L/S 14                      | Cole Parmer, Inc            | 06416-14                | Fluid transfer              |
| Tubing, pharmed, 2.79mm ID, 100'                        | Cole Parmer, Inc            | 95809-48                | Fluid transfer              |
| Male luer with lock ring x 1/8" hose barb,<br>PP, 25/pk | Cole Parmer, Inc            | 45503-04                | Fluid transfer              |
| Female luer x 1/8" hose barb adapter, PP,<br>25/pk      | Cole Parmer, Inc            | 45500-04                | Fluid transfer              |
| Nalgene jerrican waste container                        | Thermo Fisher<br>Scientific | 2240                    | Waste container             |
| Needle, blunt disposable                                | VWR                         | BD305180                | Fluid addition              |
| 20L carboys w/handle                                    | VWR                         | 16101-109               | Media vessel                |
| Polyvent filling/venting closure                        | VWR                         | 16225-229               | Media cap                   |
| Needle, blunt end 18Gx6"                                | VWR                         | 20068-682               | Waste withdrawal            |

| <b><u>Electrical equipment</u></b>                    | <b><u>Source</u></b> | <b><u>Catalog #</u></b> | <b><u>Purpose</u></b> |
|-------------------------------------------------------|----------------------|-------------------------|-----------------------|
| TruCell2 cell density meter                           | Finesse, Inc.        | CDS-PRB-10-225          | Density monitoring    |
| L10200P digital panel meter                           | Laurel Electronics   | L10200P                 | Valve control         |
| Experimentor 350 solderless breadboard                | Global Specialties   | EXP-350                 | Valve control         |
| 1N4001 Micromini Silicon Diode, 50V 1A                | Radio Shack          | 276-1101                | Valve control         |
| UL-recognized hookup wire                             | Radio Shack          | 278-1224                | Wiring                |
| Germicidal UV lamp                                    | American Air & Water | SM-36-2GR               | Sterilization         |
|                                                       |                      |                         |                       |
| <b><u>Lagoons</u></b>                                 | <b><u>Source</u></b> | <b><u>Catalog #</u></b> | <b><u>Purpose</u></b> |
| Pyrex 100 mL bottles                                  | VWR                  | 16157-103               | Lagoon vessel         |
| Pyrex 1 L bottle                                      | VWR                  | 16157-191               | Arabinose supplement  |
| GL45 septa                                            | Bellco Glass         | C139-545SS              | Port access           |
| GL45 open caps                                        | Bellco Glass         | C139-545HTSC            | Port access           |
| Thermo Variomag Poly 15 magnetic stirrer              | VWR                  | 89030-746               | Stirring              |
| Needle, blunt disposable                              | VWR                  | BD305180                | Fluid addition        |
| Needle, blunt end 18Gx6"                              | VWR                  | 20068-682               | Waste withdrawal      |
| Autoclavable 0.2 um filters                           | VWR                  | 28137-650               | Venting               |
| L/S brushless programmable drive                      | Cole Parmer, Inc     | 07550-50                | Fluid transfer        |
| L/S 8-channel pump head for microbore tubing          | Cole Parmer, Inc     | 07534-08                | Fluid transfer        |
| Microbore two-stop tube sets, silicone; 2.06 mm ID.   | Cole Parmer, Inc     | 06421-42                | Lagoon to waste       |
| Microbore two-stop tube sets, silicone; 1.42 mm ID.   | Cole Parmer, Inc     | 06421-34                | Turbidostat to lagoon |
| Microbore two-stop tube sets, silicone; 0.82 mm ID.   | Cole Parmer, Inc     | 06421-26                | Supplement to lagoon  |
| Male luer with lock ring x 1/16" hose barb, PP, 25/pk | Cole Parmer, Inc     | 45503-00                | Fluid transfer        |
| Male luer with lock ring x 3/32" hose barb, PP, 25/pk | Cole Parmer, Inc     | 45503-02                | Fluid transfer        |
| Male luer with lock ring x 1/8" hose barb, PP, 25/pk  | Cole Parmer, Inc     | 45503-04                | Fluid transfer        |
| Female luer x 1/16" hose barb adapter, PP, 25/pk      | Cole Parmer, Inc     | 45500-00                | Fluid transfer        |
| Female luer x 3/32" hose barb adapter, PP, 25/pk      | Cole Parmer, Inc     | 45500-02                | Fluid transfer        |

|                                                 |                  |          |                |
|-------------------------------------------------|------------------|----------|----------------|
| Female luer x 1/8" hose barb adapter, PP, 25/pk | Cole Parmer, Inc | 45500-04 | Fluid transfer |
| Tubing,pharmed,0.89mm ID,100ft                  | Cole Parmer, Inc | 95809-26 | Fluid transfer |
| Tubing,pharmed,1.42mm ID,100ft                  | Cole Parmer, Inc | 95809-34 | Fluid transfer |
| Tubing,pharmed,2.06mm ID,100ft                  | Cole Parmer, Inc | 95809-42 | Fluid transfer |

#### **Turbidostat Media**

| <u>Turbidostat Media</u>                     | <u>Source</u>            | <u>Catalog #</u> | <u>Purpose</u>       |
|----------------------------------------------|--------------------------|------------------|----------------------|
| Potassium phosphate dibasic, 50 kg           | VWR                      | EM-PX1570-20     | Turbidostat media    |
| Potassium phosphate monobasic, 10 kg         | United States Biological | P5110            | Turbidostat media    |
| Ammonium sulfate, 5 kg                       | United States Biological | A1450            | Turbidostat media    |
| Tween 80                                     | VWR                      | 100511-562       | Turbidostat media    |
| Glucose, 10 kg                               | United States Biological | G3050            | Turbidostat media    |
| Sodium citrate dihydrate, 5 kg               | United States Biological | S5001            | Turbidostat media    |
| Casamino acids, 10 kg                        | United States Biological | C2080            | Turbidostat media    |
| L-leucine                                    | United States Biological | L2020-05         | Turbidostat media    |
| Magnesium sulfate, anhydrous                 | Sigma Aldrich            | 246972           | Turbidostat media    |
| Carbenicillin                                | Gold Biotechnology       | C-103-100        | Turbidostat media    |
| Spectinomycin                                | Gold Biotechnology       | S-140-25         | Turbidostat media    |
| Tetracycline HCl                             | Gold Biotechnology       | T-101-25         | Turbidostat media    |
| Nalgene 500 mL filter unit, 0.2 um pore size | VWR                      | 450-0020         | Turbidostat media    |
| L-arabinose                                  | Gold Biotechnology       | A-300-1          | Inducing mutagenesis |

#### **Standard Media**

| <u>Standard Media</u>  | <u>Source</u>               | <u>Catalog #</u> | <u>Purpose</u>   |
|------------------------|-----------------------------|------------------|------------------|
| 2xYT, 10 kg            | United States<br>Biological | T9200            | Standard culture |
| LB broth Miller, 10 kg | United States<br>Biological | L1520            | Standard culture |
| Kanamycin              | Gold Biotechnology          | K-120-25         | Standard culture |
| Chloramphenicol        | Gold Biotechnology          | C-119-5          | Standard culture |
| X-Gal                  | Gold Biotechnology          | X4281C           | Standard culture |

| <b><u>PCR</u></b>                 | <b><u>Source</u></b>        | <b><u>Catalog #</u></b> | <b><u>Purpose</u></b> |
|-----------------------------------|-----------------------------|-------------------------|-----------------------|
| Oligonucleotides                  | Integrated DNA Technologies | N/A                     | Cloning               |
| HotStartPhusion II DNA polymerase | New England Biolabs         | F-549L                  | PCR                   |
| dNTPs                             | Bio-Rad                     | 170-8874                | PCR                   |
| <i>DpnI</i>                       | New England Biolabs         | R0176L                  | Template removal      |
| MinElute PCR purification kit     | Qiagen                      | 28006                   | PCR cleanup           |

| <b><u>Isothermal assembly and cloning</u></b> | <b><u>Source</u></b>      | <b><u>Catalog #</u></b> | <b><u>Purpose</u></b> |
|-----------------------------------------------|---------------------------|-------------------------|-----------------------|
| Phusion DNA polymerase                        | New England Biolabs       | F-530-L                 | Isothermal assembly   |
| Taq DNA ligase                                | New England Biolabs       | M0208L                  | Isothermal assembly   |
| T5 DNA exonuclease                            | Epicentre Biotechnologies | T5E4111K                | Isothermal assembly   |
| TempliPhi, 500 rxns                           | GE Healthcare             | 25-6400-50              | Isothermal assembly   |
| Nicotinamide adenine dinucleotide (NAD)       | Sigma Aldrich             | N8410                   | Isothermal assembly   |
| PEG-8000                                      | Sigma Aldrich             | 9510                    | Isothermal assembly   |

| <b><u>Activity assays</u></b>                       | <b><u>Source</u></b> | <b><u>Catalog#</u></b> | <b><u>Purpose</u></b>  |
|-----------------------------------------------------|----------------------|------------------------|------------------------|
| Falcon Microtest 96-well OptiLux plates             | BD Biosciences       | 353948                 | Fluorescence assays    |
| M5 plate reader                                     | Molecular Devices    |                        | Fluorescence assays    |
| 4-methylumbelliferyl-beta-D-galactopyranoside (MUG) | Gold Biotechnology   | MUG1                   | Fluorescence assays    |
| Misonix CL4 ultrasonic convertor                    | Misonix              |                        | Protein purification   |
| Ni-NTA spin columns                                 | Qiagen               | 31014                  | Protein purification   |
| Amicon Ultra-0.5 30K concentration columns          | Millipore            | UFC503096              | Protein purification   |
| NuPage 4-12% gel                                    | Invitrogen           | NP0323BOX              | Protein quantification |
| rNTPs                                               | Jena Biosciences     | NU-1014L               | T7 transcription       |

|                                  |               |                  |                 |
|----------------------------------|---------------|------------------|-----------------|
| [ $\alpha$ - <sup>32</sup> P]ATP | Perkin-Elmer  | BLU003X25<br>0UC | Phosphorimaging |
| Ribonuclease T1                  | Ambion        | AM2283           | Leader cleavage |
| Criterion 5% TBE-urea gel        | Bio-Rad       | 345-0086         | Phosphorimaging |
| Criterion 10% TBE-urea gel       | Bio-Rad       | 345-0088         | Phosphorimaging |
| Criterion 15% TBE-urea gel       | Bio-Rad       | 345-0089         | Phosphorimaging |
| Typhoon Trio                     | GE Healthcare | 63-0055-87       | Phosphorimaging |
| Phosphor screen                  | GE Healthcare | 63-0035-44       | Phosphorimaging |

### **RACE experiments**

| <u>RACE experiments</u>               | <u>Source</u>       | <u>Catalog#</u> | <u>Purpose</u>        |
|---------------------------------------|---------------------|-----------------|-----------------------|
| Turbo DNase                           | Ambion              | AM2239          | Template removal      |
| Calf intestinal phosphatase           | New England Biolabs | M0290L          | Triphosphate removal  |
| T4 polynucleotide kinase              | New England Biolabs | M0201L          | Phosphate addition    |
| T4 RNA Ligase I (ssRNA Ligase)        | New England Biolabs | M0204L          | Ligation              |
| <i>Mly</i> I                          | New England Biolabs | R0610S          | Cut T7 promoter       |
| <i>Hin</i> fl                         | New England Biolabs | R0155S          | Cut T7 promoter       |
| Superscript III reverse transcriptase | Invitrogen          | 18080093        | Reverse transcription |

### **Bacterial strains**

| <u>Bacterial strains</u>             | <u>Source</u>       | <u>Catalog#</u> | <u>Purpose</u>   |
|--------------------------------------|---------------------|-----------------|------------------|
| Mach1 chemically competent cells     | Invitrogen          | C862003         | Cloning          |
| NEB Turbo chemically competent cells | New England Biolabs | C2984H          | Cloning          |
| PirPlus DH10 $\beta$ F'DOT cells     | Thermo Fisher       | MBC1249         | Infection assays |

### **Source**

Belco Glass  
 Thermo Fisher Scientific  
 VWR  
 Bio-Chem Fluidics  
 Cole Parmer, Inc  
 Finesse, Inc.  
 Laurel Electronics  
 Global Specialties  
 American Air & Water  
 United States Biological

### **Headquarters**

Vineland, NJ  
 Waltham, MA  
 Pittsburgh, PA  
 Boonton, NJ  
 St Louis, MO  
 San Jose, CA  
 Santa Clara, CA  
 Wallingford, CT  
 Hilton Head Island,  
 SC  
 Marblehead, MA

|                             |                    |
|-----------------------------|--------------------|
| Sigma Aldrich               | St Louis, MO       |
| Gold Biotechnology          | St Louis, MO       |
| Integrated DNA Technologies | Coralville, IA     |
| Bio-Rad                     | Hercules, CA       |
| Qiagen                      | Valencia, CA       |
| Epicentre Biotechnologies   | Madison, WI        |
| GE Healthcare               | Piscataway, NJ     |
| BD Biosciences              | Franklin Lakes, NJ |
| Perkin-Elmer                | Waltham, MA        |
| Misonix                     | Farmingdale, NY    |
| Millipore                   | Billerica, MA      |
| Ambion                      | Austin, TX         |

## **Methods References and Supplementary References**

- 29 Martin, C. T. & Coleman, J. E. Kinetic analysis of T7 RNA polymerase-promoter interactions with small synthetic promoters. *Biochemistry* **26**, 2690-2696 (1987).
- 30 Gibson, D. G. *et al.* Enzymatic assembly of DNA molecules up to several hundred kilobases. *Nature Methods* **6**, 343-345 (2009).
- 31 Datsenko, K. A. & Wanner, B. L. One-step inactivation of chromosomal genes in *Escherichia coli* K-12 using PCR products. *Proc Natl Acad Sci USA* **97**, 6640-6645 (2000).
- 32 Ichetovkin, I. E., Abramochkin, G. & Shrader, T. E. Substrate recognition by the leucyl/phenylalanyl-tRNA-protein transferase. Conservation within the enzyme family and localization to the trypsin-resistant domain. *J Biol Chem* **272**, 33009-33014 (1997).
- 33 Tzagoloff, H. & Pratt, D. The initial steps in infection with coliphage M13. *Virology* **24**, 372-380 (1964).
- 34 Drake, J. W. A constant rate of spontaneous mutation in DNA-based microbes. *Proc Natl Acad Sci USA* **88**, 7160-7164 (1991).
